# Supplementary material
Source: publisher site journal article supplement (https://www.dovepress.com/article/488023)
Supplement: Supplementary file 1 [file get_supplementary_file.php]

**Supplementary Table 1** Instruments and reagents for in vivo experiments.

| Name | Company | Catalog Number |
| --- | --- | --- |
| Sprague Dawley (SD) male rats | Beijing Vital River Laboratory Animal Technology Co., Ltd, China | SCxK (Jing) 2021–0006 |
| Papain | Beijing Soleibao Biotechnology Co., LTD, China | G8430 |
| L-cysteine | Beijing Soleibao Biotechnology Co., LTD, China | C0012 |
| Sodium pentobarbital | Sigma-Aldrich Corporation, USA | P3761 |
| Electric von Frey esthesiometer | Stolting lnc, USA | ALMEMO 2450 |
| Dehydrator | Wuhan Junjie Electronics Co., LTD, China | JJ-12J |
| Embedding machine | Wuhan Junjie Electronics Co., LTD, China | JB-P5 |
| Pathological microtome | Shanghai Leica Instrument Co., LTD, China | RM2016 |
| Frozen table | Wuhan Junjie Electronics Co., LTD, China | JB-L5 |
| Oven | Shanghai Huitai Instrument Manufacturing Co., LTD, China | DHG-9140A |
| Microwave oven | Galanz microwave electric appliance Co., LTD, China | P70D20TL-P4 |
| Decolorizing shaker | SCILOGEX, USA | CF1524R |
| Anhydrous ethanol | Sinopharm Group Chemical reagent Co., LTD, China | 100092683 |
| Xylene | Sinopharm Group Chemical reagent Co., LTD, China | 10023418 |
| Neutral gum | Sinopharm Group Chemical reagent Co., LTD, China | 10004160 |
| Positive fluorescence microscope | Nikon, Japan | ECLIPSE |
| Imaging system | Nikon, Japan | DS-U3 |
| Dewaxing solution | Wuhan Servicebio Biotechnology Co., LTD, China | G1128 |
| PBS buffer | Wuhan Procell Life Technology Co., LTD, China | PB180327 |
| Reverse transcription kit | Beijing Heyi Biological Technology Co., LTD, China | E047-01B |
| qPCR kit | Beijing Heyi Biological Technology Co., LTD, China | E096-01A |
| Total RNA extraction reagent | Shanghai Yase Biomedical Technology Co., LTD, China | YY101 |
| Chloroform | Shandong Shuangshuang Chemical Co., LTD, China | GB/T682-2002 |
| Isopropanol | Tianjin Zhiyuan Chemical Reagent Co., LTD, China | 1010 |
| 4℃ centrifuge | Quzhou Xinzhi Biotechnology Co., LTD, China | CF1524R |
| Ultra-clean table | Suzhou purification Equipment Co., LTD, China | SW-CJ-2D |
| Nucleic acid quantifier | Thermo Fisher Technologies, USA | Thermo NANODROP 2000 |
| qPCR instrument | Roche, Switzerland | Roche LightCycler480 |
| RIPA | Epizyme, Inc, USA | PC101 |
| Protease inhibitor | Epizyme, Inc, USA | GRF101 |

**Continued Table 1**

| Name | Company | Catalog Number |
| --- | --- | --- |
| Phosphatase inhibitor | Epizyme, Inc, USA | GRF102 |
| PMSF | Beijing Soleibao Biotechnology Co., LTD, China | P0100 |
| BCA protein quantitative kit | Beijing Soleibao Biotechnology Co., LTD, China | PC0020 |
| Nuclear protein extraction kit | Beijing Soleibao Biotechnology Co., LTD, China | R0050 |
| 5× Loading buffer | Epizyme, Inc, USA | LT101S |
| 10× electrophoresis buffer | Epizyme, Inc, USA | PS105S |
| 10× transmembrane buffer | Epizyme, Inc, USA | PS109S |
| Skim milk powder | Epizyme, Inc, USA | PS112 |
| Developing solution | Beijing Soleibao Biotechnology Co., LTD, China | SQ201 |
| 10×TBST | Epizyme, Inc, USA | PS103S |
| Methyl alcohol | Tianjin Hengxing Chemical reagent manufacturing Co., LTD, China | 32058 |
| GraphPad Prism 8.0.2 | GraphPad Software | - |
